# Supplementary material
Source: publisher figshare collection journal article supplement (https://tandf.figshare.com/articles/dataset/_/5432620)
Supplement: Supplementary file 1 [file 2]

# Web-based Supplementary Materials for Clustering and Classification of Genetic Data Through U-Statistics by G.B. Cybis, M. Valk and S.R.C. Lopes

## 1 Variance of $B_n$

This section contains technical details related to the derivations of the homogeneity test of Section 2.2.

First, we shall consider the variance of the  $B_n$ -statistic, defined in (7). Assume that under  $H_0$ ,  $X_1, \dots, X_n$  are i.i.d. and we assume  $\mu \equiv \mathbb{E}(X_1)$ . Additionally we note that  $B_n$  is a first-order degenerated U-statistics in the Hoeffding's sense, see [2]. Under this, we can show that the first term in the H-decomposition is null. Thus  $B_n$  can be written as a function only of the second term of this decomposition. Let  $\phi_E(X_1, X_2) = (X_1 - X_2)'(X_1 - X_2)$  be the Hoeffding's decomposition, where  $\phi_E(\cdot, \cdot)$  is the kernel in the expression (2.2) when the Euclidean distance is considered. Its conditional expectation with respect to  $X_1$  is given by

$$\begin{aligned}\phi_1(X_1) &= \mathbb{E}[(X_1 - X_2)'(X_1 - X_2)|X_1] = \mathbb{E}[X_1'X_1 - 2X_1'X_2 + X_2'X_2|X_1] \\ &= X_1'X_1 - 2X_1'\mathbb{E}[X_2|X_1] + \mathbb{E}[X_2'X_2|X_1] = X_1'X_1 - 2X_1'\mu + \mathbb{E}[X_2'X_2] \\ &= X_1'X_1 - 2X_1'\mu + \mu'\mu + \text{tr}(\Sigma) = (X_1 - \mu)'(X_1 - \mu) + \text{tr}(\Sigma),\end{aligned}\tag{1}$$

where  $\Sigma$  is the covariance matrix of  $X$  and  $\text{tr}(\Sigma)$  is the trace of matrix  $\Sigma$ . Similarly, the conditional expectation with respect to  $X_2$  is given by  $\phi_1(X_2) = (X_2 - \mu)'(X_2 - \mu) + \text{tr}(\Sigma)$ . Also  $\phi_0 = \mathbb{E}(\phi_E(X_1, X_2))$  is given by

$$\begin{aligned}\phi_0 &= \mathbb{E}[(X_1 - X_2)'(X_1 - X_2)] = \mathbb{E}[X_1'X_1 - 2X_1'X_2 + X_2'X_2] \\ &= \mathbb{E}[X_1'X_1] - 2\mathbb{E}[X_1'X_2] + \mathbb{E}[X_2'X_2] = 2\text{tr}(\Sigma) + 2\mu'\mu - 2\left(\sum_{i=1}^d \text{Cov}(X_{1i}, X_{2i}) + \mu'\mu\right) \\ &= 2\text{tr}(\Sigma),\end{aligned}\tag{2}$$

and  $\phi_2(X_1, X_2) = \mathbb{E}(\phi_E(X_1, X_2)|X_1, X_2) = (X_1 - X_2)'(X_1 - X_2)$ . The second term of the Hoeffding's decomposition of  $\phi_E(\cdot, \cdot)$  is given by

$$\begin{aligned}\psi_2(X_1, X_2) &= \phi_2(X_1, X_2) - \phi_1(X_1) - \phi_1(X_2) + \phi_0 = (X_1 - X_2)'(X_1 - X_2) \\ &\quad - \{(X_1 - \mu)'(X_1 - \mu) + \text{tr}(\Sigma)\} - \{(X_2 - \mu)'(X_2 - \mu) + \text{tr}(\Sigma)\} + 2\text{tr}(\Sigma) \\ &= (X_1 - X_2)'(X_1 - X_2) - (X_1 - \mu)'(X_1 - \mu) - (X_2 - \mu)'(X_2 - \mu) \\ &= X_1'X_1 - 2X_2'X_1 + X_2'X_2 - X_2'X_2 + 2X_2'\mu - \mu'\mu - X_1'X_1 + 2X_1'\mu - \mu'\mu \\ &= -2(X_1 - \mu)'(X_2 - \mu).\end{aligned}\tag{3}$$

Furthermore, [4] say that  $\psi_2(X_i, X_j)$  has the following orthogonality proprieties

$$\mathbb{E}[\psi_2(X_i, X_j)\psi_2(X_i, X_k)] = 0 = \mathbb{E}[\psi_2(X_i, X_j)\psi_2(X_k, X_l)],$$

for all  $i, j, k, l \in \{1, 2, \dots, n\}$ . We also note that  $\mathbb{E}[\psi_2(X_i, X_j)^2] < \infty$ , for all  $i, j \in \{1, 2, \dots, n\}$ . Since the first term of Hoeffding's decomposition is null, we can write  $B_n$  as a function of the second term  $\psi_2(\cdot, \cdot)$ , by the following way

$$B_n = \frac{n_1 n_2}{n(n-1)} \left( \frac{2}{n_1 n_2} \sum_{\substack{i \in S_1 \\ j \in S_2}} \psi_2(X_i, X_j) \right)$$

$$- \frac{2}{n_1(n_1 - 1)} \sum_{\substack{i,j \in S_1 \\ i < j}} \psi_2(X_i, X_j) - \frac{2}{n_2(n_2 - 1)} \sum_{\substack{i,j \in S_2 \\ i < j}} \psi_2(X_i, X_j) \Bigg). \quad (4)$$

Thus we write

$$\begin{aligned} \text{Var}(B_n) &= \text{Var} \left\{ \frac{n_1 n_2}{n(n-1)} \left( \frac{2}{n_1 n_2} \sum_{\substack{i \in S_1 \\ j \in S_2}} \psi_2(X_i, X_j) \right. \right. \\ &\quad \left. \left. - \frac{2}{n_1(n_1 - 1)} \sum_{\substack{i,j \in S_1 \\ i < j}} \psi_2(X_i, X_j) - \frac{2}{n_2(n_2 - 1)} \sum_{\substack{i,j \in S_2 \\ i < j}} \psi_2(X_i, X_j) \right) \right\} \\ &= \frac{n_1^2 n_2^2}{n^2(n-1)^2} \left( \frac{4}{n_1^2 n_2^2} \sum_{\substack{i \in S_1 \\ j \in S_2}} \text{Var}(\psi_2(X_i, X_j)) \right. \\ &\quad \left. + \frac{4}{n_1^2(n_1 - 1)^2} \sum_{\substack{i,j \in S_1 \\ i < j}} \text{Var}(\psi_2(X_i, X_j)) + \frac{4}{n_2^2(n_2 - 1)^2} \sum_{\substack{i,j \in S_2 \\ i < j}} \text{Var}(\psi_2(X_i, X_j)) \right) \\ &= \sigma^4 \frac{n_1^2 n_2^2}{n^2(n-1)^2} \left( \left( \frac{4}{n_1^2 n_2^2} \right) n_1 n_2 + \left( \frac{4}{n_1^2(n_1 - 1)^2} \right) \frac{n_1(n_1 - 1)}{2} \right. \\ &\quad \left. + \left( \frac{4}{n_2^2(n_2 - 1)^2} \right) \frac{n_2(n_2 - 1)}{2} \right) \\ &= \sigma^4 \left( \frac{n_1^2 n_2^2}{n^2(n-1)^2} \right) \left[ \frac{4}{n_1 n_2} + \frac{2}{n_1(n_1 - 1)} + \frac{2}{n_2(n_2 - 1)} \right] \\ &= \sigma^4 \frac{n_1 n_2}{n^2(n-1)^2} \left[ \frac{2n^2 - 6n + 4}{(n_1 - 1)(n_2 - 1)} \right] = C(n, n_1) \sigma^4. \end{aligned} \quad (5)$$

where  $C(n, n_1)$  is given by

$$C(n, n_1) = \frac{n_1 n_2}{n^2(n-1)^2} \left[ \frac{2n^2 - 6n + 4}{(n_1 - 1)(n_2 - 1)} \right] \quad (6)$$

and  $\sigma^4$  is given by

$$\begin{aligned} \sigma^4 &= \text{Var}[\psi_2(X_1, X_2)] = \text{Var}[-2(X_1 - \mu)'(X_2 - \mu)] \\ &= 4 \text{Var} \left( \sum_{k=1}^L (X_{1k} - \mu_k)(X_{2k} - \mu_k) \right) = 4 \sum_{k=1}^L \text{Var}((X_{1k} - \mu_k)(X_{2k} - \mu_k)) \\ &\quad + 8 \sum_{k < s} \text{Cov}((X_{1k} - \mu_k)(X_{2k} - \mu_k), (X_{1s} - \mu_s)(X_{2s} - \mu_s)) \\ &= 4 \sum_{k=1}^L (\text{Var}(X_{1k} - \mu_k))^2 + 8 \sum_{k < s} \text{Cov}((X_{1k} - \mu_k), (X_{1s} - \mu_s))^2 = 4 \text{vec}(\Sigma)' \text{vec}(\Sigma). \end{aligned} \quad (7)$$

In Section 2.2 we explore this result to test group homogeneity.

## Clustering Algorithm - Euclidean Distance

We used the following algorithm to find the group assignments  $S_1$  and  $S_2$  that minimize the objective function given in expression (8).

### Step 1: Initialization

1. Randomly choose starting centers for groups  $G_1$  and  $G_2$  from the observations  $X_1, \dots, X_n$ .
2. Assign to each observation a set of indexes,  $S_1$  or  $S_2$ , based on the smallest Euclidean distance to its center.
3. Estimate  $\text{Var}(B_n)$  with  $n_1 = \lfloor \frac{n+1}{2} \rfloor$  through the bootstrap.
4. For each group size in  $\{2, \dots, n-2\}$  estimate  $\text{Var}(B_n)$  through expression (10).

### Step 2: Iterate

1. For each observation  $i \in \{1, \dots, n\}$ , assign  $X_i$  to group  $G_1$  if

$$f(\{S_1^{-i} \cup i\}, S_2^{-i}) < f(S_1^{-i}, \{S_2^{-i} \cup i\})$$

and assign  $X_i$  to group  $G_2$  otherwise, where  $S_g^{-i}$  is the set of all indexes, except  $i$ , in group  $G_g$ , for  $g \in \{1, 2\}$ .

2. Repeat while convergence criterion is not met.

### Step 3: Convergence

1. Stop when  $S_1$  and  $S_2$  are the same in two consecutive iterations.

## Clustering Algorithm - General Dissimilarity

Alternative algorithm to find the group assignments  $S_1$  and  $S_2$  that minimize the objective function given in expression (8), when using a general dissimilarity measure. The dissimilarity measure must satisfy the conditions for asymptotic normality of  $B_n$  outlined in [4].

### Step 1: Initialization

1. Randomly choose starting centers for groups  $G_1$  and  $G_2$  from the observations  $X_1, \dots, X_n$ .
2. Assign to each observation a set of indexes,  $S_1$  or  $S_2$ , based on the smallest dissimilarity to its center.
3. For each group size in  $\{2, \dots, \lfloor \frac{n+1}{2} \rfloor\}$  estimate  $\text{Var}(Bn)$  through the bootstrap.

### Step 2: Iterate

1. For each observation  $i \in \{1, \dots, n\}$ , assign  $X_i$  to group  $G_1$  if

$$f(\{S_1^{-i} \cup i\}, S_2^{-i}) < f(S_1^{-i}, \{S_2^{-i} \cup i\})$$

and assign  $X_i$  to group  $G_2$  otherwise, where  $S_g^{-i}$  is the set of all indexes, except  $i$ , in group  $G_g$ , for  $g \in \{1, 2\}$ .

2. Repeat while convergence criterion is not met.

### Step 3: Convergence

1. Stop when  $S_1$  and  $S_2$  are the same in two consecutive iterations.

## 2 Cluster evaluation

We perform a simulation study to compare our clustering algorithm  $Bn$  to k-means clustering ( $km$ ). Two distinct configurations are considered, Normal distribution vs. Normal distribution and Chi-squared distribution vs. Chi-squared distribution.

For the Normal setup, we simulate  $n = \{10, 25, 50, 500\}$  independent samples with dimension  $L = \{10, 50, 10, 500\}$ . We divide the  $n$  samples in two groups of size  $\lfloor n/2 \rfloor$  and  $n - \lfloor n/2 \rfloor$ , where  $\lfloor x \rfloor$  is the integer part of  $x$ . The first group is sampled from standard normal distribution and the second group is sampled from a normal distribution with unit variance and mean taking values in  $\mu_2 = \{0.5, 1, 2\}$ . The results of 100 replications are reported in the Table 1.

For the Chi-squared setup we adopt the same scheme used in the Table 1. The first group is sampled from a chi-squared distribution with 5 degrees of freedom and non-centrality parameter  $nep=0$ . The othes  $n - \lfloor n/2 \rfloor$  samples are sampled from chi-squared distribution with 5 degrees of freedom and non-centrality parameter taking values in  $nep = \{1, 2, 4\}$ . The results of 100 replications are reported in the Table .

For clustering evaluation we consider the cluster similarity index presented in [1]. Let  $C = \{C_1, \dots, C_Q\}$  and  $G = \{G_1, \dots, G_k\}$ ,  $1 \leq k \leq Q$  be the set of  $Q$  true clusters and a k-cluster solution, respectively. The cluster similarity index is defined as

$$Sim(G, C) = \frac{1}{Q} \sum_{i=1}^Q \max_{j \leq k} Sim(G_j, C_i), \quad (8)$$

where

$$Sim(G_j, C_i) = 2 \frac{|G_j \cap C_i|}{|G_j| + |C_i|}, \quad (9)$$

and  $|\cdot|$  denotes the cardinality of the elements in each set. Note that this similarity measure will return 0 if the two clusterings are completely dissimilar and 1 if they are the same.

**Table 1:** Cluster evaluation of methods *Bn* and *kmeans* for normal distributed data. Comparisons are preseted as the average cluster similarity index between true cluster and each method's result.

| $L$ | $n$       | $\mu_2=0.5$ |       |       |       |  | $\mu_2=1$ |       |       |       |  | $\mu_2=2$ |       |       |       |  |
|-----|-----------|-------------|-------|-------|-------|--|-----------|-------|-------|-------|--|-----------|-------|-------|-------|--|
|     |           | 10          | 25    | 50    | 100   |  | 10        | 25    | 50    | 100   |  | 10        | 25    | 50    | 100   |  |
| 10  | <i>Bn</i> | 0.670       | 0.667 | 0.667 | 0.664 |  | 0.667     | 0.668 | 0.691 | 0.720 |  | 0.996     | 0.962 | 0.982 | 0.994 |  |
|     | <i>km</i> | 0.689       | 0.641 | 0.623 | 0.597 |  | 0.840     | 0.864 | 0.889 | 0.890 |  | 0.998     | 0.998 | 0.999 | 0.999 |  |
| 50  | <i>Bn</i> | 0.673       | 0.679 | 0.679 | 0.689 |  | 1.000     | 0.993 | 0.976 | 0.994 |  | 1.000     | 1.000 | 1.000 | 1.000 |  |
|     | <i>km</i> | 0.793       | 0.830 | 0.783 | 0.705 |  | 0.997     | 0.999 | 0.999 | 0.999 |  | 1.000     | 1.000 | 1.000 | 1.000 |  |
| 100 | <i>Bn</i> | 0.677       | 0.718 | 0.670 | 0.753 |  | 1.000     | 1.000 | 1.000 | 1.000 |  | 1.000     | 1.000 | 1.000 | 1.000 |  |
|     | <i>km</i> | 0.872       | 0.945 | 0.959 | 0.963 |  | 1.000     | 1.000 | 1.000 | 1.000 |  | 1.000     | 1.000 | 1.000 | 1.000 |  |
| 500 | <i>Bn</i> | 0.673       | 1.000 | 1.000 | 1.000 |  | 1.000     | 1.000 | 1.000 | 1.000 |  | 1.000     | 1.000 | 1.000 | 1.000 |  |
|     | <i>km</i> | 0.999       | 1.000 | 1.000 | 1.000 |  | 1.000     | 1.000 | 1.000 | 1.000 |  | 1.000     | 1.000 | 1.000 | 1.000 |  |

**Table 2:** Cluster evaluation of methods  $Bn$  and  $kmeans$  for Chi-squared distributed data. Comparisons are preseted as the average cluster similarity index between true cluster and each method's result.

| $L$ | $n$  | ncp=1 |       |       |       | ncp=2 |       |       |       | ncp=4 |       |       |       |
|-----|------|-------|-------|-------|-------|-------|-------|-------|-------|-------|-------|-------|-------|
|     |      | 10    | 25    | 50    | 100   | 10    | 25    | 50    | 100   | 10    | 25    | 50    | 100   |
| 10  | $Bn$ | 0.666 | 0.665 | 0.667 | 0.665 | 0.665 | 0.666 | 0.667 | 0.668 | 0.672 | 0.666 | 0.668 | 0.669 |
|     | $km$ | 0.649 | 0.632 | 0.631 | 0.622 | 0.676 | 0.669 | 0.656 | 0.642 | 0.756 | 0.744 | 0.739 | 0.715 |
| 50  | $Bn$ | 0.665 | 0.664 | 0.666 | 0.668 | 0.668 | 0.668 | 0.673 | 0.675 | 0.710 | 0.882 | 0.943 | 0.966 |
|     | $km$ | 0.671 | 0.684 | 0.688 | 0.684 | 0.739 | 0.809 | 0.810 | 0.814 | 0.928 | 0.958 | 0.961 | 0.966 |
| 100 | $Bn$ | 0.667 | 0.666 | 0.669 | 0.673 | 0.665 | 0.676 | 0.726 | 0.792 | 1.000 | 1.000 | 1.000 | 1.000 |
|     | $km$ | 0.691 | 0.736 | 0.759 | 0.766 | 0.858 | 0.905 | 0.914 | 0.911 | 0.991 | 0.994 | 0.997 | 0.995 |
| 500 | $Bn$ | 0.670 | 0.670 | 0.741 | 0.824 | 1.000 | 1.000 | 1.000 | 1.000 | 1.000 | 1.000 | 1.000 | 1.000 |
|     | $km$ | 0.789 | 0.942 | 0.965 | 0.959 | 0.982 | 0.999 | 0.999 | 0.999 | 1.000 | 1.000 | 1.000 | 1.000 |

### 3 Size and power for Sigclust and U-statistics approach

In this section we present estimates of power and size for testing group homogeneity with the Sigclust ( $Sg$ ) method proposed by [3] and our method ( $Bn$ ). Two scenarios are considered. In the first one, we compare empirical power considering the normal distribution for  $n = \{10, 15, 20, 25, 30\}$  independent samples with dimension  $L = \{500, 1000\}$ . The  $n$  samples are divided into two groups of sample sizes  $\lfloor n/2 \rfloor$  and  $n - \lfloor n/2 \rfloor$ . The first group is sampled from the standard normal distribution and the second group is sampled from a normal distribution with unit variance and mean taking values in  $\mu_2 = \{0.0, 0.2, 0.3, 0.4, 0.5\}$ . The proportion of p-values lower than 0.05 in a 100 replications are reported in the Table 3. The column  $\mu_2 = 0.0$  provides the empirical size estimates.

Although the Sigclust method is not suitable for non normal data, in the second scenario, we simulate data from Chi-squared distribution. The  $n$  samples are divided in two groups of sample sizes  $\lfloor n/2 \rfloor$  and  $n - \lfloor n/2 \rfloor$  where  $n$  takes values  $n = \{10, 15, 20, 25, 30\}$  and the dimensions of each sample are  $L = \{500, 1000\}$ . The first group is sampled from a central Chi-squared distribution with 5 degrees of freedom. The other  $n - \lfloor n/2 \rfloor$  samples are sampled from a Chi-squared distribution with 5 degrees of freedom and non-centrality parameter taking values in  $ncp = \{0.0, 0.25, 0.5, 1.0, 1.5, 2.0, 3.0, 4.0, 5.0\}$ .

**Table 3:** Proportion of p-values lower than 0.05 for group homogeneity tests using Sigclust and  $Bn$  for normal data.

| $n \backslash \mu_2$ |       | L=500 |      |      |      |      | L=1000 |      |      |      |      |
|----------------------|-------|-------|------|------|------|------|--------|------|------|------|------|
|                      |       | 0.0   | 0.2  | 0.3  | 0.4  | 0.5  | 0.0    | 0.2  | 0.3  | 0.4  | 0.5  |
| 10                   | $Bn$  | 0.01  | 0.07 | 0.22 | 0.84 | 1.00 | 0.03   | 0.05 | 0.65 | 0.98 | 1.00 |
|                      | $Sg$  | 0.00  | 0.00 | 0.00 | 0.00 | 0.00 | 0.00   | 0.00 | 0.00 | 0.00 | 0.00 |
|                      | $Sgn$ | 0.00  | 0.00 | 0.00 | 0.00 | 0.00 | 0.00   | 0.00 | 0.00 | 0.00 | 0.00 |
| 15                   | $Bn$  | 0.06  | 0.11 | 0.59 | 1.00 | 1.00 | 0.03   | 0.13 | 0.95 | 1.00 | 1.00 |
|                      | $Sg$  | 0.00  | 0.00 | 0.00 | 0.00 | 0.00 | 0.00   | 0.00 | 0.00 | 0.00 | 0.00 |
|                      | $Sgn$ | 0.00  | 0.00 | 0.00 | 0.00 | 0.00 | 0.00   | 0.00 | 0.00 | 0.00 | 0.00 |
| 20                   | $Bn$  | 0.07  | 0.20 | 0.87 | 1.00 | 1.00 | 0.02   | 0.37 | 0.99 | 1.00 | 1.00 |
|                      | $Sg$  | 0.00  | 0.00 | 0.00 | 0.00 | 0.00 | 0.00   | 0.00 | 0.00 | 0.00 | 0.00 |
|                      | $Sgn$ | 0.00  | 0.00 | 0.00 | 0.00 | 0.00 | 0.00   | 0.00 | 0.00 | 0.00 | 0.01 |
| 25                   | $Bn$  | 0.06  | 0.16 | 0.98 | 1.00 | 1.00 | 0.04   | 0.47 | 1.00 | 1.00 | 1.00 |
|                      | $Sg$  | 0.00  | 0.00 | 0.00 | 0.00 | 0.47 | 0.00   | 0.00 | 0.00 | 0.00 | 0.82 |
|                      | $Sgn$ | 0.00  | 0.00 | 0.00 | 0.00 | 0.62 | 0.00   | 0.00 | 0.00 | 0.00 | 0.92 |
| 30                   | $Bn$  | 0.09  | 0.40 | 1.00 | 1.00 | 1.00 | 0.02   | 0.65 | 1.00 | 1.00 | 1.00 |
|                      | $Sg$  | 0.00  | 0.00 | 0.00 | 0.03 | 1.00 | 0.00   | 0.00 | 0.00 | 0.01 | 1.00 |
|                      | $Sgn$ | 0.00  | 0.00 | 0.00 | 0.03 | 1.00 | 0.00   | 0.00 | 0.00 | 0.01 | 1.00 |

### References

- [1] Sonia Pérttega Díaz and José A. Vilar. Comparing several parametric and nonparametric approaches to time series clustering: A simulation study. *Journal of Classification*, 27(3):333–362, Nov 2010.
- [2] Justin Lee. *U-statistics: Theory and Practice*. New York: Marcel Dekker, 1990.
- [3] Yufeng Liu, David Neil Hayes, Andrew Nobel, and JS Marron. Statistical significance of



**Table 4:** Proportion of p-values lower than 0.05 for testing group homogeneity using Sigclust ( $Sg$  and normalized  $Sgn$ ) and  $Bn$  with Chi-squared data.

| $L$  | $n$ | $\mu_2$ | ncp  |      |      |      |      |      |      |      |      |
|------|-----|---------|------|------|------|------|------|------|------|------|------|
|      |     |         | 0.0  | 0.25 | 0.5  | 1.0  | 1.5  | 2.0  | 3.0  | 4.0  | 5.0  |
| 500  | 10  | $Bn$    | 0.07 | 0.02 | 0.07 | 0.17 | 0.93 | 1.00 | 1.00 | 1.00 | 1.00 |
|      |     | $Sg$    | 0.00 | 0.00 | 0.00 | 0.00 | 0.00 | 0.00 | 0.00 | 0.02 | 0.90 |
|      |     | $Sgn$   | 0.00 | 0.00 | 0.00 | 0.00 | 0.00 | 0.00 | 0.00 | 0.10 | 1.00 |
|      | 15  | $Bn$    | 0.02 | 0.06 | 0.06 | 0.60 | 0.99 | 1.00 | 1.00 | 1.00 | 1.00 |
|      |     | $Sg$    | 0.00 | 0.00 | 0.00 | 0.00 | 0.00 | 0.00 | 0.05 | 1.00 | 1.00 |
|      |     | $Sgn$   | 0.00 | 0.00 | 0.00 | 0.00 | 0.00 | 0.00 | 0.22 | 1.00 | 1.00 |
|      | 20  | $Bn$    | 0.03 | 0.04 | 0.07 | 0.81 | 1.00 | 1.00 | 1.00 | 1.00 | 1.00 |
|      |     | $Sg$    | 0.00 | 0.00 | 0.00 | 0.00 | 0.00 | 0.00 | 1.00 | 1.00 | 1.00 |
|      |     | $Sgn$   | 0.00 | 0.00 | 0.00 | 0.00 | 0.00 | 0.00 | 1.00 | 1.00 | 1.00 |
|      | 25  | $Bn$    | 0.06 | 0.10 | 0.12 | 0.99 | 1.00 | 1.00 | 1.00 | 1.00 | 1.00 |
|      |     | $Sg$    | 0.00 | 0.00 | 0.00 | 0.00 | 0.00 | 0.02 | 1.00 | 1.00 | 1.00 |
|      |     | $Sgn$   | 0.00 | 0.00 | 0.00 | 0.00 | 0.00 | 0.13 | 1.00 | 1.00 | 1.00 |
|      | 30  | $Bn$    | 0.09 | 0.11 | 0.20 | 1.00 | 1.00 | 1.00 | 1.00 | 1.00 | 1.00 |
|      |     | $Sg$    | 0.00 | 0.00 | 0.00 | 0.00 | 0.00 | 0.91 | 1.00 | 1.00 | 1.00 |
|      |     | $Sgn$   | 0.00 | 0.00 | 0.00 | 0.00 | 0.00 | 0.98 | 1.00 | 1.00 | 1.00 |
| 1000 | 10  | $Bn$    | 0.03 | 0.07 | 0.01 | 0.46 | 1.00 | 1.00 | 1.00 | 1.00 | 1.00 |
|      |     | $Sg$    | 0.00 | 0.00 | 0.00 | 0.00 | 0.00 | 0.00 | 0.00 | 0.00 | 0.97 |
|      |     | $Sgn$   | 0.00 | 0.00 | 0.00 | 0.00 | 0.00 | 0.00 | 0.00 | 0.07 | 1.00 |
|      | 15  | $Bn$    | 0.04 | 0.04 | 0.03 | 0.94 | 1.00 | 1.00 | 1.00 | 1.00 | 1.00 |
|      |     | $Sg$    | 0.00 | 0.00 | 0.00 | 0.00 | 0.00 | 0.00 | 0.03 | 1.00 | 1.00 |
|      |     | $Sgn$   | 0.00 | 0.00 | 0.00 | 0.00 | 0.00 | 0.00 | 0.27 | 1.00 | 1.00 |
|      | 20  | $Bn$    | 0.06 | 0.05 | 0.06 | 1.00 | 1.00 | 1.00 | 1.00 | 1.00 | 1.00 |
|      |     | $Sg$    | 0.00 | 0.00 | 0.00 | 0.00 | 0.00 | 0.00 | 1.00 | 1.00 | 1.00 |
|      |     | $Sgn$   | 0.00 | 0.00 | 0.00 | 0.00 | 0.00 | 0.00 | 1.00 | 1.00 | 1.00 |
|      | 25  | $Bn$    | 0.03 | 0.07 | 0.08 | 1.00 | 1.00 | 1.00 | 1.00 | 1.00 | 1.00 |
|      |     | $Sg$    | 0.00 | 0.00 | 0.00 | 0.00 | 0.00 | 0.04 | 1.00 | 1.00 | 1.00 |
|      |     | $Sgn$   | 0.00 | 0.00 | 0.00 | 0.00 | 0.00 | 0.23 | 1.00 | 1.00 | 1.00 |
|      | 30  | $Bn$    | 0.08 | 0.03 | 0.14 | 1.00 | 1.00 | 1.00 | 1.00 | 1.00 | 1.00 |
|      |     | $Sg$    | 0.00 | 0.00 | 0.00 | 0.00 | 0.00 | 1.00 | 1.00 | 1.00 | 1.00 |
|      |     | $Sgn$   | 0.00 | 0.00 | 0.00 | 0.00 | 0.00 | 1.00 | 1.00 | 1.00 | 1.00 |

clustering for high-dimension, low-sample size data. *Journal of the American Statistical Association*, 103(483):1281–1293, 2008.

- [4] Aluísio Pinheiro, Pranab K. Sen, and Hildete P. Pinheiro. Decomposability of high-dimensional diversity measures: Quasi-statistics, martingales and nonstandard asymptotics. *Journal of Multivariate Analysis*, 100(8):1645 – 1656, 2009.
